# Supplementary material for: A high-sensitivity PtNPs@CsCu 2 I 3 single-crystal UV photodetector for precision sunscreen protection monitoring
Source: Royal Society of Chemistry journal article supplement (doi:10.1039/d5ce01094b), 2026-01-01
Supplement: d5ce01094b1.pdf [file d5ce01094b1.pdf]

**Supporting Information**  
**A High-Sensitivity PtNPs@CsCu<sub>2</sub>I<sub>3</sub> Single-Crystal UV**  
**Photodetector for Precision Sunscreen Protection**  
**Monitoring**

Wenjie Li,<sup>a</sup> Mengdan Chen,<sup>a</sup> Hang Yin,<sup>a</sup> Peng Wan,<sup>a</sup> Caixia Kan,<sup>a</sup> Daning Shi,<sup>a</sup>  
Zhipeng Sun,<sup>\*b</sup> and Mingming Jiang<sup>\*a</sup>

<sup>a</sup> College of Physics, MIIT Key Laboratory of Aerospace Information Materials and Physics, Key Laboratory for Intelligent Nano Materials and Devices, Nanjing University of Aeronautics and Astronautics, No. 29 Jiangjun Road, Nanjing 211106, P. R. China.

\*E-mail: mmjiang@nuaa.edu.cn

<sup>b</sup> Department of Physics and Mathematics, Faculty of Military Health Service, Naval Medical University, 800 Xiangyin Road, Shanghai 200433, China.

\*E-mail: sunzpciomp@126.com

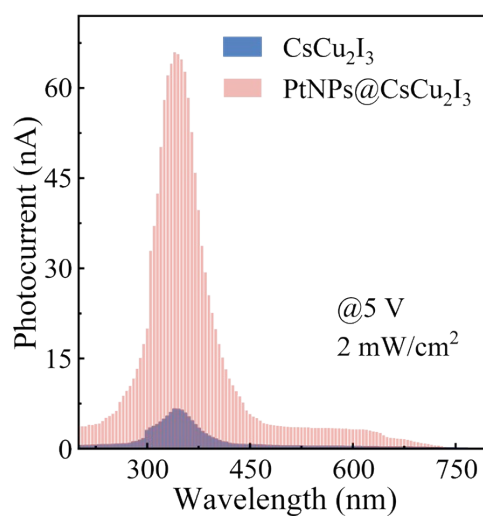

**Figure S1.** Wavelength-dependent photocurrent of the fabricated photodetectors when measured at 5 V bias (the light irradiance was maintained at 2 mW/cm<sup>2</sup>), where the CsCu<sub>2</sub>I<sub>3</sub> SC was uncoated and coated with PtNPs. The measured peak photocurrent of the PtNPs@CsCu<sub>2</sub>I<sub>3</sub> SC detector at 340 nm is 66 nA, which is 10-fold than that of the pristine one.

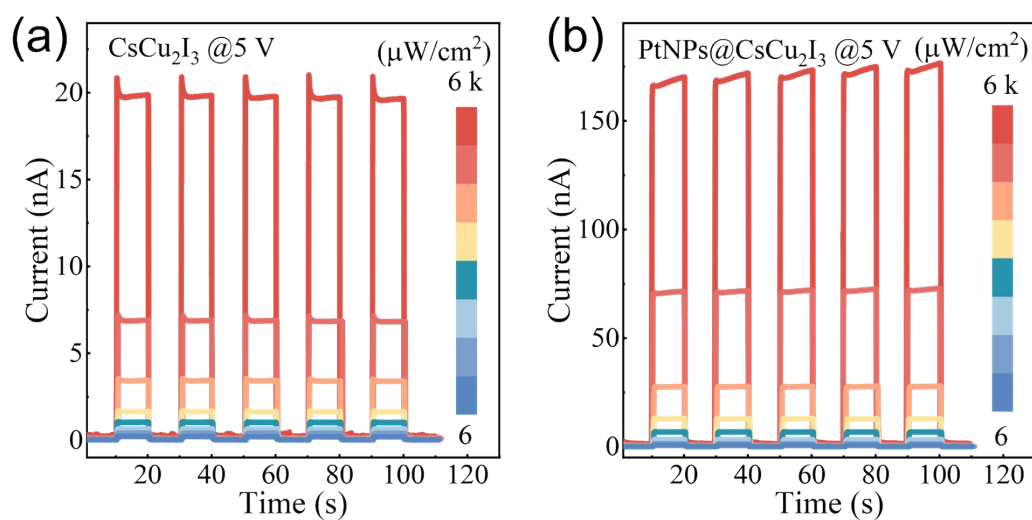

**Figure S2.** Time-dependent photocurrent of the fabricated photodetectors when measured at 5 V bias (The light irradiance was maintained at the range of 6 μW/cm<sup>2</sup> to 6 mW/cm<sup>2</sup>), in which the CsCu<sub>2</sub>I<sub>3</sub> SC was (a) uncoated, and (b) coated with PtNPs.

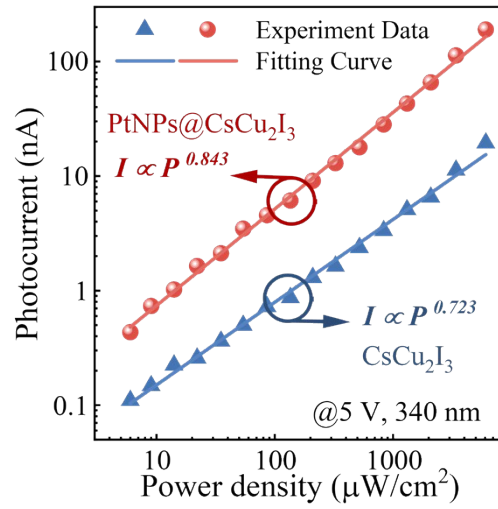

**Figure S3.** Light irradiance-dependent photocurrent of the fabricated photodetectors when measured at 5 V bias (the light wavelength was 340 nm), where the CsCu<sub>2</sub>I<sub>3</sub> SC was uncoated and coated with PtNPs. The exponent  $\theta$  can be fitted to approximately 0.723 for the pristine CsCu<sub>2</sub>I<sub>3</sub> SC detector. After coating with PtNPs, the fitted  $\theta$  value increases to around 0.843.

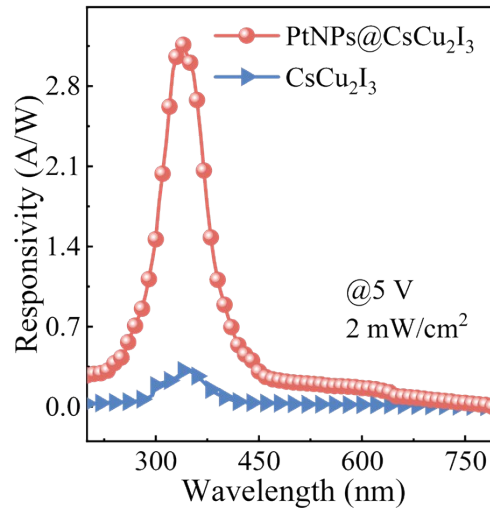

**Figure S4.** Wavelength-dependent responsivities of the fabricated photodetectors when measured at 5 V bias (The light irradiance was maintained at 2 mW/cm<sup>2</sup>), where the CsCu<sub>2</sub>I<sub>3</sub> SC was uncoated and coated with PtNPs. The measured peak responsivity of the PtNPs@CsCu<sub>2</sub>I<sub>3</sub> SC detector at 340 nm is 3.2 A/W, which is 10-fold than that of the pristine one.

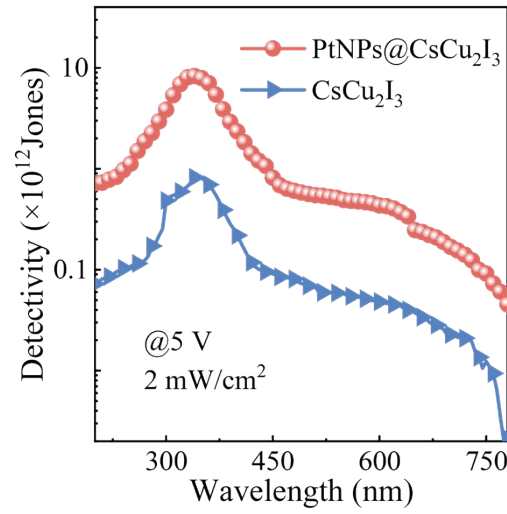

**Figure S5.** Wavelength-dependent detectivities of the fabricated photodetectors when measured at 5 V bias (The light irradiance was maintained at 2 mW/cm<sup>2</sup>), in which the CsCu<sub>2</sub>I<sub>3</sub> SC was uncoated and coated with PtNPs. The measured peak detectivity of the PtNPs@CsCu<sub>2</sub>I<sub>3</sub> SC detector at 340 nm is  $8.33 \times 10^{12}$  Jones, which is 10-fold than that of the pristine one.

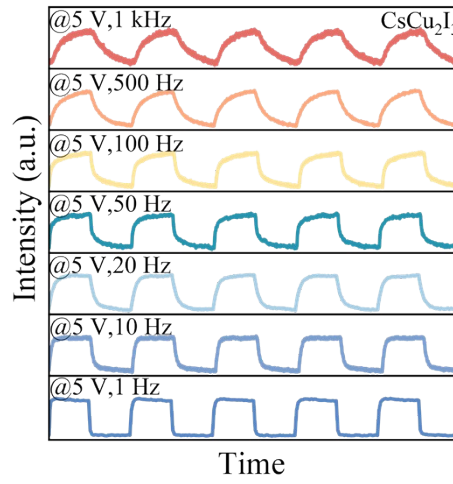

**Figure S6.** The pristine CsCu<sub>2</sub>I<sub>3</sub> SC detector's photoresponse characteristics to pulsed light (340 nm) at varying modulation frequencies in the range of 1 to 1k Hz.

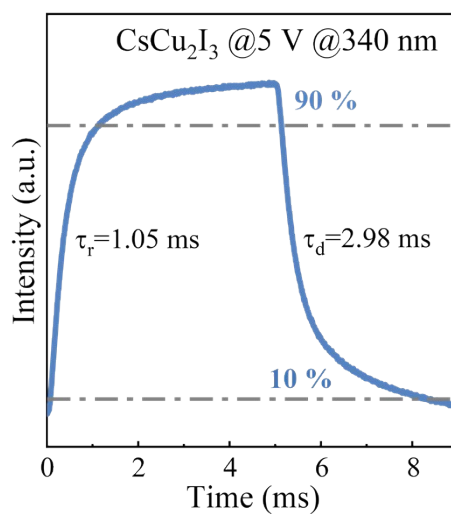

**Figure S7.** Transient response of the pristine CsCu<sub>2</sub>I<sub>3</sub> SC detector to 340 nm light pulses at 5 V bias, showing a rise time of 1.05 ms and a decay time of 2.98 ms.

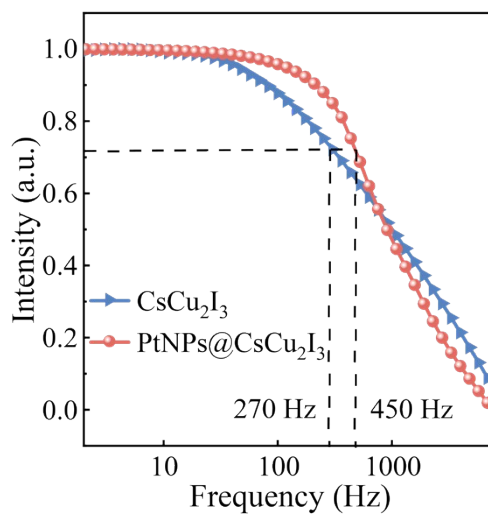

**Figure S8.** Normalized photoresponse as a function of modulation frequency for the pristine and PtNPs@CsCu<sub>2</sub>I<sub>3</sub> photodetectors under 340 nm illumination at 5 V. The -3 dB cutoff frequency is 270 Hz for the pristine device and 450 Hz for the PtNPs-coated device, defining the operational bandwidth of each detector.

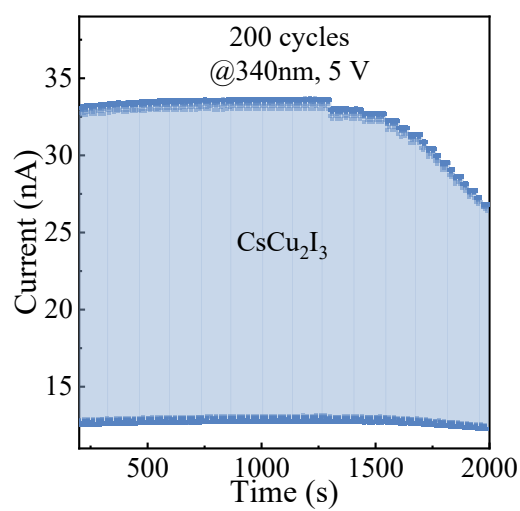

**Figure S9.** Long-term photoresponse curve of the pristine  $\text{CsCu}_2\text{I}_3$  under 340 nm LED irradiation via  $6 \text{ mW/cm}^2$  at 5 V bias.

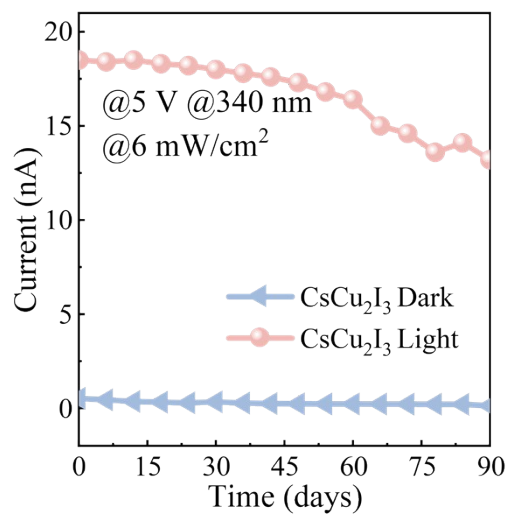

**Figure S10.** The variation of recorded photocurrent as a function of storage duration.

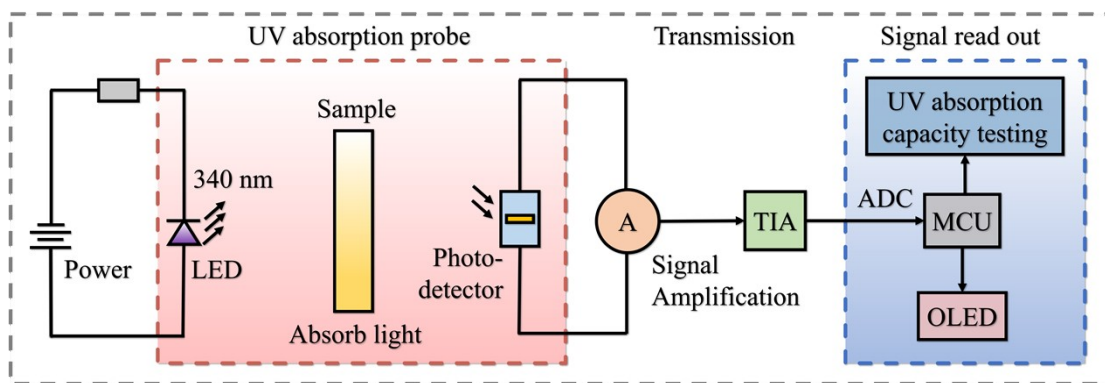

**Figure S11.** Schematic diagram of the custom UV monitoring system for evaluating sunscreen protection performance. The system comprises a 340 nm UV-LED light source, a sample stage for sunscreen film application, the PtNPs@CsCu<sub>2</sub>I<sub>3</sub> SC detector as the signal receiver, and a signal processing unit for data acquisition and real-time display on an OLED screen. In which, the signal processing unit is made of a transimpedance amplifier (TIA), analog-to-digital converter (ADC), and microcontroller (MCU).
